# Supplementary material for: Identification of Metal Contamination Sources and Evaluation of the Anthropogenic Effects in Soils near Traffic-Related Facilities
Source: MDPI journal article supplement (doi:10.3390/toxics9110278), 2021-10-21
Supplement: s1 [file s1]

## Supplementary Materials:

# Identification of Metal Contamination Sources and Evaluation of the Anthropogenic Effects in Soils near Traffic-Related Facilities

Hong-gil Lee, Yoon Joo Byun, Young-Woo Chun, Hoe-Jung Noh, Dong-Jin Kim, Hyun-Koo Kim and Ji-In Kim

**Table S1.** Test of normality involving the concentration of metals in potentially contaminated areas (Shapiro–Wilk test).

| Source | Zn     |         | Pb     |         | Cu     |         | As     |         | Ni     |         |
|--------|--------|---------|--------|---------|--------|---------|--------|---------|--------|---------|
|        | w      | p-value |
| GAR    | 0.5425 | ***     | 0.4457 | ***     | 0.4193 | ***     | 0.6754 | ***     | 0.612  | ***     |
| ARS    | 0.3872 | ***     | 0.4249 | ***     | 0.5603 | ***     | 0.6458 | ***     | 0.7737 | ***     |
| PAL    | 0.7305 | ***     | 0.4978 | ***     | 0.7848 | ***     | 0.7836 | ***     | 0.7564 | ***     |
| ASY    | 0.5777 | ***     | 0.5776 | ***     | 0.4908 | ***     | 0.6902 | ***     | 0.8328 | ***     |
| DSC    | 0.8026 | ***     | 0.4941 | ***     | 0.6372 | ***     | 0.7364 | ***     | 0.9389 | *       |
| RDS    | 0.8831 | **      | 0.4846 | ***     | 0.7131 | ***     | 0.8443 | ***     | 0.835  | ***     |

\*\*\*  $p < 0.001$ , \*\*  $p < 0.01$ , \*  $p < 0.05$  (significance level). GAR, garage; ARS, auto repair shop; ASY, auto salvage yard; PAL, parking lot; DSC, driving school; RDS, roadside; NB, natural background.

**Table S2.** Significance of differences in metal concentration for soils in potentially contaminated areas.

| Element | chi-square | df | p-value |
|---------|------------|----|---------|
| Zn      | 193.5      | 5  | ***     |
| Pb      | 157.3      | 5  | ***     |
| Cu      | 70.5       | 5  | ***     |
| As      | 50.2       | 5  | ***     |
| Ni      | 80.3       | 5  | ***     |

\*\*\*  $p < 0.001$  (significance level).

**Table S3.** Posthoc Dunn test with characters.

| Source | Zn | Pb | Cu | As | Ni |
|--------|----|----|----|----|----|
| GAR    | a  | a  | ab | a  | a  |
| ARS    | a  | a  | a  | a  | a  |
| PAL    | b  | b  | ab | a  | a  |
| ASY    | ab | a  | a  | a  | a  |
| DSC    | a  | a  | ab | a  | a  |
| RDS    | b  | b  | ab | a  | a  |

Groups followed by the same character are not significantly different. GAR, garage; ARS, auto repair shop; ASY, auto salvage yard; PAL, parking lot; DSC, driving school; RDS, roadside; NB, natural background.

**Table S4.** Kaiser–Meyer–Olkin (KMO) test and Fligner–Killeen test.

| Component               | GAR    | ARS    | ASY    | PAL    | DSC    | RDS    |
|-------------------------|--------|--------|--------|--------|--------|--------|
| KMO value               | 0.78   | 0.69   | 0.60   | 0.64   | 0.55   | 0.54   |
| Med chi-square          | 193.48 | 124.09 | 37.335 | 66.285 | 22.412 | 74.983 |
| Fligner–Killeen test df | 4      | 4      | 4      | 4      | 4      | 4      |
| p-value                 | <0.001 | <0.001 | <0.001 | <0.001 | <0.001 | <0.005 |

GAR, garage; ARS, auto repair shop; ASY, auto salvage yard; PAL, parking lot; DSC, driving school; RDS, roadside; NB, natural background.

**Table S5.** Importance of components for each contamination sources.

| <GAR>     |                    |               |              | <ARS>     |                    |               |              |
|-----------|--------------------|---------------|--------------|-----------|--------------------|---------------|--------------|
| Component | Standard Deviation | % of Variance | Cumulative % | Component | Standard Deviation | % of Variance | Cumulative % |
| PC1       | 1.708              | 58.3          | 58.3         | PC1       | 1.546              | 47.8          | 47.8         |
| PC2       | 0.990              | 19.6          | 77.9         | PC2       | 1.022              | 20.9          | 68.7         |
| PC3       | 0.800              | 12.8          | 90.7         | PC3       | 0.944              | 17.8          | 86.5         |
| PC4       | 0.580              | 6.7           | 97.4         | PC4       | 0.648              | 8.4           | 94.9         |
| PC5       | 0.361              | 2.6           | 100.0        | PC5       | 0.505              | 5.1           | 100.0        |

  

| <ASY>     |                    |               |              | <PAL>     |                    |               |              |
|-----------|--------------------|---------------|--------------|-----------|--------------------|---------------|--------------|
| Component | Standard Deviation | % of Variance | Cumulative % | Component | Standard Deviation | % of Variance | Cumulative % |
| PC1       | 1.597              | 51.0          | 51.0         | PC1       | 1.475              | 43.5          | 43.5         |
| PC2       | 1.060              | 22.5          | 73.5         | PC2       | 1.084              | 23.5          | 67.0         |
| PC3       | 0.880              | 15.5          | 89.0         | PC3       | 0.911              | 16.6          | 83.6         |
| PC4       | 0.628              | 7.9           | 96.9         | PC4       | 0.676              | 9.1           | 92.7         |
| PC5       | 0.397              | 3.1           | 100.0        | PC5       | 0.603              | 7.3           | 100.0        |

  

| <DSC>     |                    |               |              | <RDS>     |                    |               |              |
|-----------|--------------------|---------------|--------------|-----------|--------------------|---------------|--------------|
| Component | Standard Deviation | % of Variance | Cumulative % | Component | Standard Deviation | % of Variance | Cumulative % |
| PC1       | 1.400              | 39.0          | 39.0         | PC1       | 1.284              | 33.0          | 33.0         |
| PC2       | 1.001              | 20.3          | 59.3         | PC2       | 1.024              | 21.0          | 54.0         |
| PC3       | 0.983              | 19.3          | 78.7         | PC3       | 0.998              | 19.9          | 73.9         |
| PC4       | 0.912              | 16.6          | 95.3         | PC4       | 0.911              | 16.6          | 90.5         |
| PC5       | 0.485              | 4.7           | 100.0        | PC5       | 0.692              | 9.5           | 100.0        |

GAR, garage; ARS, auto repair shop; ASY, auto salvage yard; PAL, parking lot; DSC, driving school; RDS, roadside; NB, natural background.

**Table S6.** Extracted PCs and their rotated loadings.

| <GAR>   |           |        | <ARS>   |           |        |
|---------|-----------|--------|---------|-----------|--------|
| Element | Component |        | Element | Component |        |
|         | PC1       | PC2    |         | PC1       | PC2    |
| Zn      | 0.535     | −0.055 | Zn      | 0.557     | −0.186 |
| Pb      | 0.545     | −0.059 | Pb      | 0.568     | −0.146 |
| Cu      | 0.495     | −0.063 | Cu      | 0.540     | −0.049 |
| As      | 0.104     | 0.994  | As      | 0.093     | 0.815  |
| Ni      | 0.402     | −0.028 | Ni      | 0.260     | 0.528  |

  

| <ASY>   |           |     | <PAL>   |           |     |
|---------|-----------|-----|---------|-----------|-----|
| Element | Component |     | Element | Component |     |
|         | PC1       | PC2 |         | PC1       | PC2 |

|    |       |        |
|----|-------|--------|
| Zn | 0.541 | −0.376 |
| Pb | 0.488 | 0.141  |
| Cu | 0.525 | −0.363 |
| As | 0.268 | 0.767  |
| Ni | 0.348 | 0.345  |

&lt;DSC&gt;

| Element | Component |        |
|---------|-----------|--------|
|         | PC1       | PC2    |
| Zn      | 0.617     | −0.301 |
| Pb      | 0.647     | −0.175 |
| Cu      | 0.204     | 0.784  |
| As      | 0.309     | 0.509  |
| Ni      | 0.254     | −0.073 |

|    |       |        |
|----|-------|--------|
| Zn | 0.556 | −0.299 |
| Pb | 0.525 | −0.322 |
| Cu | 0.555 | 0.093  |
| As | 0.254 | 0.521  |
| Ni | 0.209 | 0.726  |

&lt;RDS&gt;

| Element | Component |        |
|---------|-----------|--------|
|         | PC1       | PC2    |
| Zn      | 0.624     | −0.287 |
| Pb      | 0.633     | −0.087 |
| Cu      | 0.004     | 0.632  |
| As      | 0.218     | 0.685  |
| Ni      | 0.402     | 0.205  |

GAR, garage; ARS, auto repair shop; ASY, auto salvage yard; PAL, parking lot; DSC, driving school; RDS, roadside; NB, natural background.

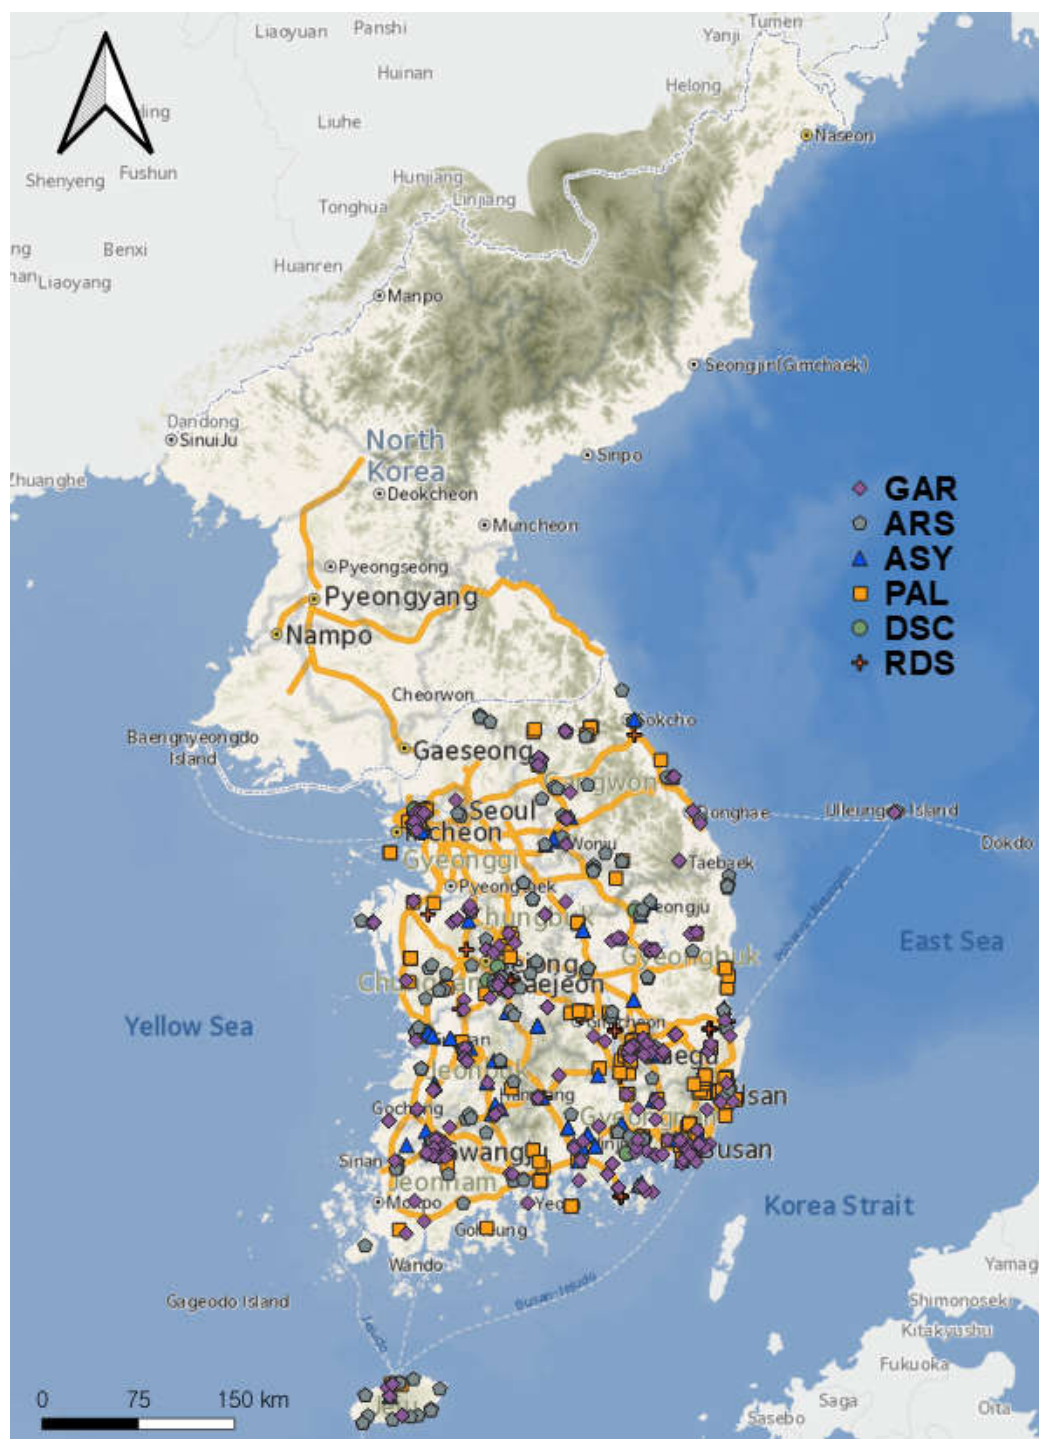

**Figure S1.** 801 sampling sites in the study area; garage (GAR), auto repair shop (ARS), auto salvage yard (ASY), parking lot (PAL), driving school (DSC), roadside (RDS).

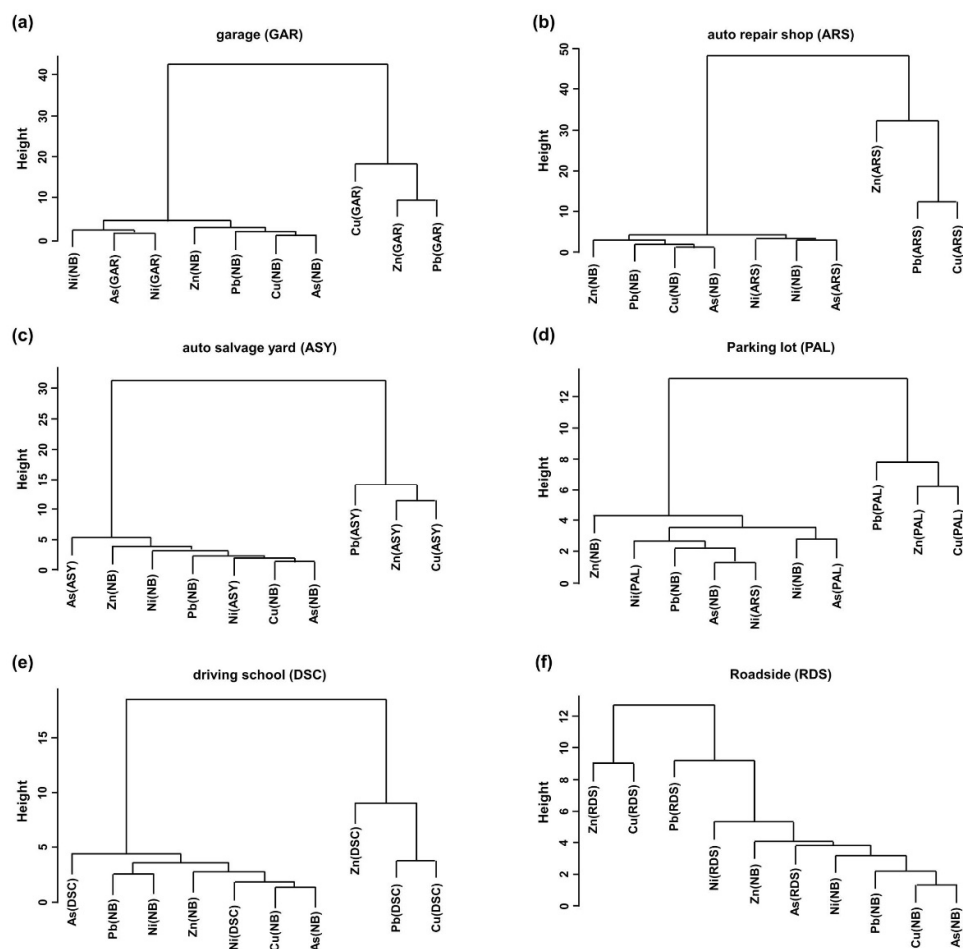

**Figure S2.** Groups according to metal contamination degree for each contamination source and natural background (NB); (a) garage (GAR), (b) auto repair shop (ARS), (c) auto salvage yard (ASY), (d) parking lot (PAL), (e) driving school (DSC), and (f) roadside (RDS).
